# Supplementary material for: Effekt Glückssache?
Source: Atypon-hosted journal article supplement (doi:10.1024/1010-0652/a000263), 2020-01-10
Supplement: 1010-0652_a000263_esm3.pdf [file 1010-0652_a000263_esm3.pdf]

### Elektronisches Supplement 3

Anagrammaufgabe in der Glücksbedingung, Studie 2  
(Platzierung und Grösse der Symbole war in anderen Induktionsbedingungen  
identisch).

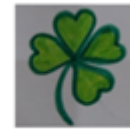

RMIDENEL

Sie haben für diese Aufgabe 8 Minuten Zeit, danach werden Sie automatisch weitergeleitet. Bitte notieren Sie hier alle möglichen Wörter und nutzen Sie für jedes Wort eine neue Zeile.

|  |
|--|
|  |
|  |
|  |
|  |
|  |
|  |
|  |
|  |
|  |
|  |
