# Supplementary figures and images for: Effekt Glückssache?
Source: Atypon-hosted journal article supplement (doi:10.1024/1010-0652/a000263), 2020-01-10

## **Elektronisches Supplement 1**

Anzeige für Experimentalgruppe während der Aufgabe in Studie 1.

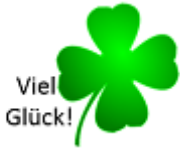

Supplement: 1010-0652_a000263_esm1.pdf [file 1010-0652_a000263_esm1.pdf]

## Elektronisches Supplement 2

Distraktorbild bei Qualitätscheck in Studie 1.

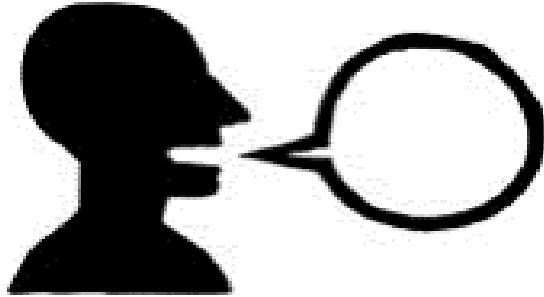

Supplement: 1010-0652_a000263_esm2.pdf [file 1010-0652_a000263_esm2.pdf]
